# Supplementary material for: Low Rates of Pointing in 18-Month-Olds at Risk for Autism Spectrum Disorder and Extremely Preterm Infants: A Common Index of Language Delay?
Source: PubMed Central journal article supplement (PMC6794419; doi:10.3389/fpsyg.2019.02131), 2019-10-09
Supplement: Table_1.pdf [file Table_1.pdf]

## Supplementary File.

Biological and medical characteristics of ELGA infants and comparison of biological and medical characteristics between the ELGA-no LD and the ELGA-LD groups.

Significant results are in bold ( $p < .05$ ).

|                                               | ELGA<br>( <i>n</i> = 20) | ELGA-no LD<br>( <i>n</i> = 11) | ELGA-LD<br>( <i>n</i> = 9) | <i>t</i> / $\chi^2$ | <i>p</i>    |
|-----------------------------------------------|--------------------------|--------------------------------|----------------------------|---------------------|-------------|
| Weeks of gestational age, <i>M (DS) range</i> | 25.8 (1.5) 23-28         | 26.5 (1.2) 25-28               | 24.9 (1.3) 23-26           | .99                 | <b>.012</b> |
| Birthweight, <i>M (DS) range</i>              | 803 (191) 509-1093       | 862 (172) 516-1093             | 730 (198) 509-1040         | .43                 | .128        |
| Hospitalization days, <i>M (DS) range</i>     | 91.5 (32.2) 49-152       | 73.5 (22.9) 49-113             | 113.4 (28.5) 76-152        | .24                 | <b>.003</b> |
| Caesarean section, <i>n (%)</i>               | 17 (85)                  | 10 (91)                        | 7 (78)                     | 1.82                | .285        |
| First born, <i>n (%)</i>                      | 15 (75)                  | 9 (82)                         | 6 (67)                     | .61                 | .617        |
| Later born, <i>n (%)</i>                      | 5 (25)                   | 2 (18)                         | 3 (33)                     | .61                 | .617        |
| Multiple births, <i>n (%)</i>                 | 6 (30)                   | 3 (27)                         | 3 (33)                     | .64                 | .642        |
| BW < 1000 g, <i>n (%)</i>                     | 16 (80)                  | 8 (73)                         | 8 (89)                     | .81                 | .369        |
| SGA, <i>n (%)</i>                             | 2 (10)                   | 1 (9)                          | 1 (11)                     | .022                | 1           |
| MV, <i>n (%)</i>                              | 11 (55)                  | 5 (46)                         | 6 (67)                     | .90                 | .406        |
| RDS, <i>n (%)</i>                             | 20 (100)                 | 11 (100)                       | 9 (100)                    | -                   |             |
| Apnoea, <i>n (%)</i>                          | 6 (30)                   | 4 (36)                         | 2 (22)                     | .47                 | .426        |
| BPD, <i>n (%)</i>                             | 12 (60)                  | 5 (46)                         | 8 (89)                     | 4.10                | .070        |
| IVH I/II, <i>n (%)</i>                        | 1 (5)                    | 0 (0)                          | 1 (11)                     | 1.29                | .450        |
| HE ( $\geq$ 14d.), <i>n (%)</i>               | 17 (85)                  | 10 (91)                        | 7 (78)                     | 1.34                | .511        |
| ROP I/II, <i>n (%)</i>                        | 13 (65)                  | 6 (56)                         | 7 (78)                     | 1.80                | .406        |
| Sepsis, <i>n (%)</i>                          | 6 (30)                   | 1 (9)                          | 5 (56)                     | 5.09                | .050        |
| Hyperbil.with phototer., <i>n (%)</i>         | 16 (80)                  | 8 (73)                         | 8 (89)                     | 1.30                | 5.22        |

### Medical complications (infants could have one or more medical complications): MV:

mechanical ventilation. **SGA**: infants with a birthweight <10th percentile for gestational age. **RDS**:

respiratory distress syndrome, acute illness coming on within 4-6 h of delivery, clinically

characterized by a respiratory rate  $\geq$ 60/min, dyspnoea and respiratory distress. **Apnoea**: significant

apnoea was defined as more than four episodes of apnoea/hour or more than two episodes of

apnoea/hour if ventilation with bag and mask was required. **BPD**: bronchopulmonary dysplasia,

need of both supplemental oxygen for  $\geq 28$  days and at 36 weeks of post-conceptual age. **IVH I/II**: intra-ventricular haemorrhage originating within the subependymal germinal matrix filling less than respectively 10% (I grade) and 50% (II grade) of the ventricular area on parasagittal view. **HE**: hyperechogenicity, a prolonged flare  $\geq 14$  days without cystic lesions and/or ventricular dilatation and that resolved completely without any abnormality in its place. **ROP I/II**: retinopathy of prematurity, vasoproliferative retinopathy that resolved without a specific therapy before the presumed date of birth. **Sepsis**: presence of a positive blood culture and/or clinical and laboratoristic signs. **Hyperbil. with phototer.**: hyperbilirubinemia needing phototherapy according to the criteria proposed by Gomella (2009).
